# Supplementary material for: Live imaging reveals the cellular events downstream of SARM1 activation
Source: eLife journal article supplement (doi:10.7554/elife.71148), 2021-11-15
Supplement: supp [file elife_poa_e71148_Figure_3_figure_supplement_1.pdf › elife_poa_e71148_Figure_3_figure_supplement_1.pdf]

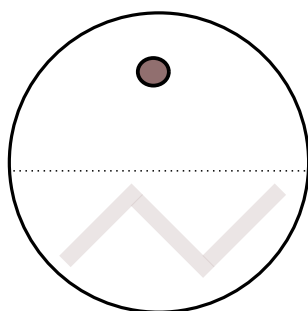

**FluoroDish**

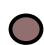

2  $\mu$ l suspension ( $\sim 7 \times 10^6$  cells/ml)

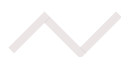

2  $\mu$ l suspension ( $\sim 7 \times 10^4$  cells/ml)

Single axon imaging area
