# Supplementary material for: Live imaging reveals the cellular events downstream of SARM1 activation
Source: eLife journal article supplement (doi:10.7554/elife.71148), 2021-11-15
Supplement: supp [file Source-Fig 1 B_C_F.xlsx]

## Sheet: Figure 1B
Figure 1 B
	GFP_uncut			GFP_cut			SARM1_cut			E642A_cut
Sample No.	0h	2h	4h	0h	2h	4h	0h	2h	4h	0h	2h	4h
1	22.7273	21.7391	22.7273	17.3913	18.1818	19.0476	21.7391	22.7273	10.5263	22.2222	23.0769	21.4286
2	18.5185	20.6897	19.2308	17.8571	18.5185	19.2308	20	20.6897	12	21.7391	20.8333	22.7273
3	25	26.087	23.8095	16.6667	15.7895	15	22.7273	24	5.26316	29.1667	26.9231	30.7692
4	21.875	20	20.6897	25	26.087	27.2727	24.1379	20	8	31.8182	27.2727	26.087
5	17.3913	18.1818	14.2857	27.5862	24.1379	23.3333	23.0769	21.7391	5	19.2308	18.5185	17.8571
6				25	27.2727	26.3158	23.0769	20.8333	10.5263	20	19.2308	18.5185
7				19.3548	18.75	18.1818	26.3158	18.75	7.69231	28.5714	27.2727	23.8095
8				20.8333	24	21.7391	25	27.2727	6.66667	28.5714	31.25	29.4118
9				26.6667	22.5806	23.3333	30	23.5294	0	21.4286	22.2222	20
10							20	24	10	18.75	20	18.75
11										15.625	18.75	18.1818
12										17.3913	20.8333	21.7391
13										25	22.2222	23.8095
AVG	21.1024	21.3395	20.1486	21.8174	21.702	21.4949	23.6074	22.3542	7.56748	23.0396	22.9543	22.5453
count	5	5	5	9	9	9	10	10	10	13	13	13
SEM	1.39422	1.32071	1.66674	1.42346	1.33565	1.33187	0.950298	0.782617	1.12179	1.41791	1.1091	1.16181
Statistics
Table Analyzed		One-way ANOVA data
Data sets analyzed		A : GFP_U_0	B : GFP_U_2	C : GFP_u_4	D : GFP_c_0	E : GFP_c_2
ANOVA summary
F		12.28
P value		<0.0001
P value summary		****
Significant diff. among means (P < 0.05)?		Yes
R square		0.577
Brown-Forsythe test
F (DFn, DFd)		0.8286 (11, 99)
P value		0.6119
P value summary		ns
Are SDs significantly different (P < 0.05)?		No
Bartlett's test
Bartlett's statistic (corrected)		6.95
P value		0.8032
P value summary		ns
Are SDs significantly different (P < 0.05)?		No
ANOVA table		SS	DF	MS	F (DFn, DFd)	P value
Treatment (between columns)		2042	11	185.6	F (11, 99) = 12.28	P<0.0001
Residual (within columns)		1497	99	15.12
Total		3539	110
Data summary
Number of treatments (columns)		12
Number of values (total)		111

## Sheet: Figure 1C
Figure 1C
	GFP_Base	GFP_Cut_4 hr	SARM1	SARM1.E642A	GFP_Cut_24 hr
	1.04907	0.834221	0.153152	0.949359	0.913641
	1.01817	0.932482	0.364547	0.703445	0.710213
	0.995419	0.941627	0.30403	1.03983	0.820819
	0.902382	0.793652	0.267321	0.81157	0.97984
	1.03495	1.06861	0.100311	0.885809	0.942206
			0.248902	0.785988	0.789171
AVG	1	0.914119	0.239711	0.862668	0.859315
SEM	0.0237261	0.0437121	0.0368365	0.0457576	0.0389072
Statistics
Table Analyzed	One-way ANOVA data
Data sets analyzed	A : GFP_Base	B : GFP_Cut_4 hr	C : GFP_Cut_24 hr	D : SARM1	E : SARM1.E642A
ANOVA summary
F	53.11
P value	<0.0001
P value summary	****
Significant diff. among means (P < 0.05)?	Yes
R square	0.9023
Brown-Forsythe test
F (DFn, DFd)	0.8199 (4, 23)
P value	0.5257
P value summary	ns
Are SDs significantly different (P < 0.05)?	No
Bartlett's test
Bartlett's statistic (corrected)	1.987
P value	0.7382
P value summary	ns
Are SDs significantly different (P < 0.05)?	No
ANOVA table	SS	DF	MS	F (DFn, DFd)	P value
Treatment (between columns)	2.153	4	0.5383	F (4, 23) = 53.11	P<0.0001
Residual (within columns)	0.2331	23	0.01014
Total	2.386	27
Data summary
Number of treatments (columns)	5
Number of values (total)	28

## Sheet: Figure 1F
Figure 1F
	Base	CTL_4	SARM1_4h	E642A_4h
	1.20376	0.912825	1.41298	0.810454
	0.896055	0.940085	1.39186	0.866285
	0.979638	0.950282	2.02177	0.895872
	0.944036	0.95664	2.09412	0.668961
	1.03585	0.88412	2.17892	1.10252
			2.30055	1.25245
			2.61419	1.19707
			2.85443	1.18675
AVG	1.01187	0.92879	2.1086	0.997546
SEM	0.0531281	0.013445	0.1822	0.0758457
Statistics
Table Analyzed	One-way ANOVA data
Data sets analyzed	A : CTL	B : CTL_4	C : SARM1_4h	D : E642A_4h
ANOVA summary
F	23.05
P value	<0.0001
P value summary	****
Significant diff. among means (P < 0.05)?	Yes
R square	0.7586
Brown-Forsythe test
F (DFn, DFd)	4.488 (3, 22)
P value	0.0133
P value summary	*
Are SDs significantly different (P < 0.05)?	Yes
Bartlett's test
Bartlett's statistic (corrected)	23.71
P value	<0.0001
P value summary	****
Are SDs significantly different (P < 0.05)?	Yes
ANOVA table	SS	DF	MS	F (DFn, DFd)	P value
Treatment (between columns)	7.045	3	2.348	F (3, 22) = 23.05	P<0.0001
Residual (within columns)	2.241	22	0.1019
Total	9.286	25
Data summary
Number of treatments (columns)	4
Number of values (total)	26
