# Supplementary material for: Live imaging reveals the cellular events downstream of SARM1 activation
Source: eLife journal article supplement (doi:10.7554/elife.71148), 2021-11-15
Supplement: supp [file Source-Fig 2 A_B_C_E_G_I.xlsx]

## Sheet: Figure 2A
Figure 2A
	DMSO		CSA 1uM		CSA 10 uM		CSA 100 uM
(hr)	AVG	SEM	AVG	SEM	AVG	SEM	AVG	SEM
0	0.169127	0.0055654	0.179392	0.00522947	0.165953	0.00546701	0.166869	0.00504103
9	0.68406	0.0581655	0.530825	0.0194986	0.556415	0.0150629	0.534391	0.0271548
24	0.77249	0.0376985	0.765155	0.0275611	0.723875	0.0284307	0.780073	0.0303797

## Sheet: Figure 2B
Figure 2B
	DMSO_4h	CsA_4h
	2.14025	4.54328
	2.06295	5.14748
	5.65518	1.9771
	4.93409	3.56256
	6.00064	4.03576
AVG	4.15862	3.85324
SEM	0.857313	0.538003
Statistics
Table Analyzed	Unpaired t test data
Column B	CsA_4h
vs.	vs.
Column A	DMSO_4h
Unpaired t test
P value	0.7706
P value summary	ns
Significantly different (P < 0.05)?	No
One- or two-tailed P value?	Two-tailed
t, df	t=0.3017 df=8
How big is the difference?
Mean ± SEM of column A	4.159 ± 0.8573, n=5
Mean ± SEM of column B	3.853 ± 0.538, n=5
Difference between means	-0.3054 ± 1.012
95% confidence interval	-2.639 to 2.029
R squared (eta squared)	0.01125
F test to compare variances
F, DFn, Dfd	2.539, 4, 4
P value	0.3888
P value summary	ns
Significantly different (P < 0.05)?	No

## Sheet: Figure 2C
Figure 2C
	DMSO		10 uM BAPTA
(hr)	AVG	SEM	AVG	SEM
0	0.263833	0.0115739	0.24621	0.0119135
9	0.61915	0.0180702	0.74956	0.0224327
24	0.807275	0.0157094	0.85707	0.0135548

## Sheet: Figure 2E
Figure 2E
	CTL		EGTA		2hr only EGTA		2h later EGTA
(hr)	AVG	SEM	AVG	SEM	AVG	SEM	AVG	SEM
0	0.0961431	0.00384657	0.102333	0.00380147	0.111465	0.00311245	0.100208	0.00312112
6	0.473286	0.0174358	0.164802	0.00584244	0.61553	0.01568	0.17105	0.00513669
9	0.613975	0.0176373	0.217186	0.00721712	0.733562	0.0136507	0.237079	0.00677572
24	0.745539	0.0168038	0.290659	0.00836186	0.795222	0.0117691	0.344268	0.0155116
48	0.854952	0.0145522	0.306173	0.00830343	0.787895	0.0184611	0.366345	0.00803574

## Sheet: Figure 2G
Figure 2G
	No cut	Cut_4 hr	Cut_4 hr_EGTA
	1.18617	0.14114	0.12194
	0.875307	0.156099	0.0160034
	0.937221	0.125798	0.0217987
	1.2283	0.486781	0.0865772
	0.951243	0.259268	0.143576
	0.821763	0.149479	0.0767197
			0.01317
AVG	1	0.219761	0.0777692
SEM	0.0684139	0.0568223	0.0194994
Statistics
Table Analyzed	One-way ANOVA data
Data sets analyzed	A : No cut	B : Cut_4 hr	C : Cut_4 hr_EGTA
ANOVA summary
F	98.27
P value	<0.0001
P value summary	****
Significant diff. among means (P < 0.05)?	Yes
R square	0.9247
Brown-Forsythe test
F (DFn, DFd)	1.014 (2, 16)
P value	0.3851
P value summary	ns
Are SDs significantly different (P < 0.05)?	No
Bartlett's test
Bartlett's statistic (corrected)	6.036
P value	0.0489
P value summary	*
Are SDs significantly different (P < 0.05)?	Yes
ANOVA table	SS	DF	MS	F (DFn, DFd)	P value
Treatment (between columns)	3.122	2	1.561	F (2, 16) = 98.27	P<0.0001
Residual (within columns)	0.2542	16	0.01589
Total	3.376	18
Data summary
Number of treatments (columns)	3
Number of values (total)	19

## Sheet: Figure 2I
Figure 2I	(lef)					(Right)
	No. of Mito						Mobile Mito (%)
	No cut	Cut_4h	EGTA_4hr_uncut	ETGA_4hr_cut			No cut	Cut_4h	EGTA_4hr_uncut	ETGA_4hr_cut
	17	16	38	40			35.2941	0	13.1579	10
	25	19	23	25			28	5.26316	0	0
	26	24	30	22			7.69231	4.16667	10	13.6364
	23	20	22	24			26.087	5	0	8.33333
	40	30	19	22			30	6.66667	0	0
	29	24	31	26			13.7931	0	3.22581	0
	23	27	29	37			13.0435	3.7037	10.3448	0
	32	33		28			15.625	9.09091		0
	17	16					11.7647	6.25
	25	24					20	8.33333
	30	28					20	10.7143
	32						18.75
AVG	26.5833	23.7273	27.4286	28			20.0041	5.38079	5.24693	3.99621
SEM	1.8888	1.67924	2.45781	2.41276			2.40246	1.02553	2.17036	2.01617
Statistics
Table Analyzed	One-way ANOVA data						Table Analyzed	moving One-way ANOVA data
Data sets analyzed	A : No. of mitochondria	B : No. of mitochondria	C : Data Set-C	D : Data Set-D			Data sets analyzed	A : No cut	B : Cut_4h	C : EGTA_4hr_uncut	D : ETGA_4hr_cut
ANOVA summary							ANOVA summary
F	0.8787						F	16.34
P value	0.4618						P value	<0.0001
P value summary	ns						P value summary	****
Significant diff. among means (P < 0.05)?	No						Significant diff. among means (P < 0.05)?	Yes
R square	0.07195						R square	0.5904
Brown-Forsythe test							Brown-Forsythe test
F (DFn, DFd)	0.06112 (3, 34)						F (DFn, DFd)	1.827 (3, 34)
P value	0.9799						P value	0.1608
P value summary	ns						P value summary	ns
Are SDs significantly different (P < 0.05)?	No						Are SDs significantly different (P < 0.05)?	No
Bartlett's test							Bartlett's test
Bartlett's statistic (corrected)	0.3974						Bartlett's statistic (corrected)	7.146
P value	0.9408						P value	0.0674
P value summary	ns						P value summary	ns
Are SDs significantly different (P < 0.05)?	No						Are SDs significantly different (P < 0.05)?	No
ANOVA table	SS	DF	MS	F (DFn, DFd)	P value		ANOVA table	SS	DF	MS	F (DFn, DFd)	P value
Treatment (between columns)	105.5	3	35.17	F (3, 34) = 0.8787	P=0.4618		Treatment (between columns)	1878	3	626.1	F (3, 34) = 16.34	P<0.0001
Residual (within columns)	1361	34	40.02				Residual (within columns)	1303	34	38.32
Total	1466	37					Total	3181	37
Data summary							Data summary
Number of treatments (columns)	4						Number of treatments (columns)	4
Number of values (total)	38						Number of values (total)	38
