# Supplementary material for: Live imaging reveals the cellular events downstream of SARM1 activation
Source: eLife journal article supplement (doi:10.7554/elife.71148), 2021-11-15
Supplement: supp [file Source-Fig 2-figure supplement 1.xlsx]

## Sheet: 6B TMRM
	Image	Normalized TMRM
H20	1	1.14175
H20	2	1.03087
H20	3	0.827377
H20	4	0.754843
H20	5	0.960591
H20	6	1.15023
H20	7	1.13434
EGTA	1	0.941954
EGTA	2	0.880943
EGTA	3	0.896624
EGTA	4	0.66787
EGTA	5	0.728722
EGTA	6	0.826496
EGTA	7	0.778761

## Sheet: 6D Flou4
		Mean/uncut
Cut_4Hr	1	1.76656
Cut_4Hr	2	2.63463
Cut_4Hr	3	2.29087
Cut_4Hr	4	2.60279
Cut_4Hr	5	3.17202
Cut_4Hr	6	3.26073
bapta_cut_4Hr	1	1.44065
bapta_cut_4Hr	2	1.62932
bapta_cut_4Hr	3	1.47095
bapta_cut_4Hr	4	1.56128
bapta_cut_4Hr	5	2.27866
bapta_cut_4Hr	6	1.70317
egta_cut_4Hr	1	0.973032
egta_cut_4Hr	2	1.03238
egta_cut_4Hr	3	0.574136
egta_cut_4Hr	4	1.14118
egta_cut_4Hr	5	1.20789
egta_cut_4Hr	6	1.74023
