# Supplementary material for: Live imaging reveals the cellular events downstream of SARM1 activation
Source: eLife journal article supplement (doi:10.7554/elife.71148), 2021-11-15
Supplement: supp [file Source-Fig 3 C_D_E_F.xlsx]

## Sheet: Figure 3C
	Figure 3C
Frame no.	Time (hr)	Nor. Ca	Nor. mRuby3
0 (pre)	0	1	1
1	0.0166667	1.29921	1.0004
2	0.1	2.36449	0.92135
3	0.183333	5.56699	0.866616
4	0.266667	6.14726	0.831577
5	0.35	4.80717	0.817418
6	0.433333	3.45932	0.828746
7	0.516667	2.74896	0.925895
8	0.6	1.71937	0.869239
9	0.683333	1.28411	0.933068
10	0.766667	1.25546	0.961273
11	0.85	1.20866	0.941458
12	0.933333	1.08884	0.975904
13	1.01667	1.09526	0.985081
14	1.1	0.96519	0.969478
15	1.18333	1.04097	0.97245
16	1.26667	0.981817	0.940447
17	1.35	1.00538	0.963895
18	1.43333	0.980286	0.968518
19	1.51667	0.988865	0.972046
20	1.6	1.00347	0.962547
21	1.68333	0.954804	0.946785
22	1.76667	0.980039	0.961705
23	1.85	0.888003	0.932282
24	1.93333	0.884458	0.964978
25	2.01667	0.919631	0.968106
26	2.1	0.932971	0.943683
27	2.18333	0.95124	0.936656
28	2.26667	0.965305	0.967728
29	2.35	0.969256	0.979715
30	2.43333	1.04392	0.979291
31	2.51667	1.04943	0.974848
32	2.6	1.04348	0.942121
33	2.68333	1.02208	0.924041
34	2.76667	1.04943	0.946585
35	2.85	1.07402	0.962142
36	2.93333	0.986337	0.882833
37	3.01667	0.943744	0.89611
38	3.1	0.926842	0.917202
39	3.18333	0.874771	0.919164
40	3.26667	0.968819	0.938427
41	3.35	1.17073	0.972286
42	3.43333	1.3924	0.947922
43	3.51667	1.43569	0.941465
44	3.6	1.33776	0.950498
45	3.68333	1.56752	0.937663
46	3.76667	2.18151	0.949088
47	3.85	5.95018	0.956312
48	3.93333	7.64875	0.982786
49	4.01667	7.91463	0.927984
50	4.1	7.90585	0.973334
51	4.18333	7.95267	0.920172
52	4.26667	7.80224	0.896156
53	4.35	7.40704	0.882605
54	4.43333	7.38219	0.844274
55	4.51667	7.18704	0.828061
56	4.6	7.49607	0.854663
57	4.68333	7.35822	0.848759
58	4.76667	8.31542	1.03035
59	4.85	8.38245	1.05969
60	4.93333	8.74958	1.10636
61	5.01667	8.82727	1.04964
62	5.1	3.22057	0.232302
63	5.18333	0.696889	0.104223
64	5.26667	1.02611	0.18761
65	5.35	0.658268	0.118721
66	5.43333	0.580392	0.104875
67	5.51667	0.599948	0.10403
68	5.6	0.593432	0.105566
69	5.68333	0.592792	0.105456
70	5.76667	0.68618	0.121541
71	5.85	0.467989	0.0792763
72	5.93333	0.553588	0.106287
73	6.01667	0.584058	0.104907
74	6.1	0.595006	0.105106
75	6.18333	0.460854	0.0807021
76	6.26667	0.455542	0.0797411
77	6.35	0.464377	0.079649
78	6.43333	0.468461	0.0797968
79	6.51667	0.476364	0.0806078
80	6.6	0.468284	0.0790046
81	6.68333	0.454661	0.078769
82	6.76667	0.458141	0.0801814
83
84
85

## Sheet: Figure 3D
Figure 3D
Axon	2nd Ca peak initiation	AxD
1	3.76667	5.1
2	3.82806	4.99472
3	3.82806	4.66139
4	3.32806	4.32806
5	4.99472	6.49472
6	8.35833	10.525
7	7.35833	9.69167
8	3.525	4.025
9	6.85833	8.19167
10	7.025	8.025
11	5.20972	6.87639
12	4.04306	5.20972
13	5.37639	7.04306
14	4.57306	7.23972
15	2.90639	4.07306
16	3.1	5.76667
17	3.96944	4.96944
18	2.30278	3.30278
19	2.96944	4.30278
20	3.30278	4.63611
21	4.775	6.275
22	4.275	5.275
AVG	4.53062	5.95486
SEM	0.349863	0.41234

## Sheet: Figure 3E
Figure 3E
Axon	2nd Ca Peak duration	AxD
1	1.33333	5.1
2	1.16667	4.99472
3	0.833333	4.66139
4	1.16667	4.32806
5	1.5	6.49472
6	2.16667	10.525
7	2.33333	9.69167
8	0.5	4.025
9	1.33333	8.19167
10	1	8.025
11	1.66667	6.87639
12	1.16667	5.20972
13	1.66667	7.04306
14	3.33333	7.23972
15	1.16667	4.07306
16	2.66667	5.76667
17	1	4.96944
18	1	3.30278
19	1.33333	4.30278
20	1.33333	4.63611
21	2	6.275
22	1	5.275
AVG	1.48485	5.95486
SEM	0.144134	0.41234

## Sheet: Figure 3F
Figure 3E
Axon	2nd Ca Peak intensity	AxD
1	7.40382	5.1
2	3.79361	4.99472
3	2.90456	4.66139
4	2.66175	4.32806
5	3.84639	6.49472
6	4.08946	10.525
7	2.62571	9.69167
8	2.6642	4.025
9	2.94817	8.19167
10	3.22354	8.025
11	2.69896	6.87639
12	2.55361	5.20972
13	3.32756	7.04306
14	4.83767	7.23972
15	7.85105	4.07306
16	5.47128	5.76667
17	5.03652	4.96944
18	3.66536	3.30278
19	3.46315	4.30278
20	6.40511	4.63611
21	4.4891	6.275
22	3.37727	5.275
AVG	4.06081	5.95486
SEM	0.335949	0.41234
