# Supplementary material for: Live imaging reveals the cellular events downstream of SARM1 activation
Source: eLife journal article supplement (doi:10.7554/elife.71148), 2021-11-15
Supplement: supp [file Source-Fig 4 B_C_E.xlsx]

## Sheet: Figure 4B
Figure 4B
						MitoDR			Time				G6
	mins	hr	Total	static	moving	moving (%)		mins	hr	Avg ROI	Background	Axon (I)	Nor. Axon (I)
Pre_Base	0	0	37	27	10	27.027		0	0	9.30003	8.66309	15.0325	1
Post_T1	20	0.333333	35	26	9	25.7143		20	0.333333	9.26503	8.65595	14.7467	0.980994
T2	60	1	38	28	10	26.3158		60	1	9.19396	8.70381	13.6053	0.905064
T3	120	2	37	27	10	27.027		120	2	9.21217	8.61381	14.5974	0.971061
T4	140	2.33333	35	26	9	25.7143		140	2.33333	9.1561	8.68238	13.4196	0.892707
T5	160	2.66667	37	27	10	27.027		160	2.66667	9.20467	8.71774	13.5871	0.90385
T6	180	3	33	26	7	21.2121		180	3	9.13789	8.65416	13.4914	0.897486
T7	200	3.33333	32	27	5	15.625		200	3.33333	9.18967	8.67881	13.7874	0.917178
T8	220	3.66667	31	26	5	16.129		220	3.66667	9.22574	8.59024	14.9453	0.9942
T9	240	4	30	26	4	13.3333		240	4	9.37717	8.68452	15.611	1.03849
T10	260	4.33333	25	25	0	0	G6_T10	260.25	4.3375	9.27643	8.63964	15.0075	0.99834
T11	280	4.66667	25	25	0	0	2	262	4.36667	9.24143	8.6325	14.7218	0.979334
						0	3	263	4.38333	9.17036	8.68036	13.5804	0.903404
						0	4	264	4.4	9.18857	8.59036	14.5725	0.969401
						0	5	265	4.41667	9.1325	8.65893	13.3946	0.891048
						0	6	266	4.43333	9.18107	8.69429	13.5621	0.90219
						0	7	267	4.45	9.11429	8.63071	13.4665	0.895826
						0	8	268	4.46667	9.16607	8.65536	13.7625	0.915518
						0	9	269	4.48333	9.20214	8.56679	14.9203	0.99254
						0	10	270	4.5	9.35357	8.66107	15.5861	1.03683
						0	11	271	4.51667	9.33357	8.72179	14.8396	0.987172
						0	12	272	4.53333	9.25929	8.60893	15.1125	1.00533
						0	13	273	4.55	9.36107	8.68643	15.4328	1.02663
						0	14	274	4.56667	9.38786	8.63821	16.1347	1.07332
						0	15	275	4.58333	9.42036	8.68107	16.074	1.06928
						0	16	276	4.6	9.44214	8.69571	16.16	1.07501
						0	17	277	4.61667	9.50071	8.54571	18.0957	1.20377
						0	18	278	4.63333	9.5325	8.71214	16.9157	1.12528
						0	19	279	4.65	9.63464	8.66786	18.3357	1.21974
						0	20	280	4.66667	9.81393	8.69321	19.9004	1.32383
						0	21	281	4.68333	9.9125	8.64	21.365	1.42126
						0	22	282	4.7	9.93321	8.62071	21.7457	1.44658
						0	23	283	4.71667	10.0357	8.71964	21.8803	1.45554
						0	24	284	4.73333	10.3475	8.63036	25.8018	1.7164
						0	25	285	4.75	10.3611	8.59929	26.2171	1.74403
						0	26	286	4.76667	10.6086	8.64393	28.2903	1.88195
						0	27	287	4.78333	10.9057	8.67143	31.0142	2.06315	<== GCaMP6 is 2 fold
						0	28	288	4.8	11.2618	8.67714	34.5236	2.2966
						0	29	289	4.81667	11.6496	8.71464	38.0646	2.53216
						0	30	290	4.83333	11.7425	8.61571	39.8836	2.65316
						0	31	291	4.85	12.2932	8.62643	45.2942	3.01309
						0	32	292	4.86667	13.1346	8.695	53.0914	3.53178
						0	33	293	4.88333	13.7111	8.62	59.5307	3.96014
						0	34	294	4.9	14.015	8.62964	62.4832	4.15655
						0	35	295	4.91667	14.6871	8.6075	69.4039	4.61693
						0	36	296	4.93333	14.7036	8.70571	68.6843	4.56906
						0	37	297	4.95	15.3732	8.67071	75.6957	5.03548
						0	38	298	4.96667	15.2161	8.55679	75.1496	4.99916
						0	39	299	4.98333	15.9029	8.67107	80.989	5.3876
						0	40	300	5	15.7461	8.63179	79.7746	5.30682
						0	41	301	5.01667	16.0889	8.67286	82.8336	5.51031
						0	42	302	5.03333	16.0618	8.65893	82.6875	5.5006
						0	43	303	5.05	16.3557	8.58607	86.2825	5.73974
						0	44	304	5.06667	16.1061	8.65107	83.2011	5.53476
						0	45	305	5.08333	16.2729	8.68321	84.5797	5.62647
						0	46	306	5.1	16.4932	8.63143	87.2492	5.80405
						0	47	307	5.11667	16.625	8.65	88.4	5.88061
						0	48	308	5.13333	16.32	8.72464	84.6782	5.63302
						0	49	309	5.15	16.1632	8.57857	84.425	5.61618
						0	50	310	5.16667	16.5529	8.58929	88.225	5.86897

## Sheet: Figure 4C
Figure 4C
		MitoDR stop	G6 (influx)	Delta T
		4.15	4.65	0.5
		4.23	4.68	0.45
		3.98	4.39667	0.416667
		4.15	4.55	0.4
		4.65	5.08333	0.433333
		3.73333	4.11667	0.383333
		3.58333	3.91667	0.333333
		4.4	4.91667	0.516667
		3.35	3.71667	0.366667
	AVG			0.422222
	SEM			0.0200308

## Sheet: Figure 4E
Figure 4E
	183.34 um = 512 pixel					Axon (I) = 10* AVG ROI - 9*Background
	ROI for analysis (pixel x pixel) = 100 (W) x 28 (H)					Axon = 100 (w) x 2.8 (H)
			TMRM					G6
	mins	hr	Avg ROI	Background	Axon (I)	Nor. Axon (I)		Avg ROI	Background	Axon (I)	Nor. Axon (I)
Pre 1_1	0	0	13.0928	10.4049	37.2845	1		3.75366	3.22635	8.49947	1
Post 1_2	10	0.166667	12.7255	10.1332	36.0568	0.967072		3.98036	3.48086	8.47582	0.997218
3	20	0.333333	12.6872	10.1274	35.7249	0.958172		3.98001	3.58086	7.57232	0.890917
4	30	0.5	12.0479	9.402	35.8608	0.961816		3.87112	3.41485	7.97753	0.938592
5	40	0.666667	12.0993	9.40129	36.3816	0.975784		3.93112	3.41485	8.57753	1.00918
6	50	0.833333	12.1717	9.58301	35.4701	0.951338		3.9211	3.46483	8.02749	0.94447
7	60	1	12.121	9.58122	34.9793	0.938174		3.9211	3.40483	8.56749	1.008
8	70	1.16667	11.9716	9.33738	35.6791	0.956942		3.79871	3.3056	8.23665	0.969079
9	80	1.33333	11.963	9.33738	35.5934	0.954644		3.77987	3.3056	8.04827	0.946914
10	90	1.5	11.8354	9.16566	35.8633	0.961882		3.76803	3.20457	8.83917	1.03997
11	100	1.66667	11.8272	9.16566	35.7811	0.959678		3.70803	3.20457	8.23917	0.969375
12	110	1.83333	12.2014	9.38593	37.5402	1.00686		3.77872	3.30346	8.05603	0.947828
13	120	2	12.311	9.412	38.4016	1.02996		3.78303	3.29382	8.18588	0.963105
14	130	2.16667	12.547	9.7458	37.7573	1.01268		3.8137	3.39522	7.58006	0.891827
15	140	2.33333	11.9589	9.27312	36.1313	0.969072		3.72586	3.32774	7.30894	0.859929
16	150	2.5	11.6237	9.11121	34.2362	0.918243		3.79905	3.38558	7.52032	0.884798
17	160	2.66667	12.276	9.56408	36.683	0.983868		3.79582	3.38986	7.44945	0.876461
18	170	2.83333	11.4042	9.71439	26.6126	0.713772	<==TMRM drop	3.89578	3.45948	7.82249	0.92035
19	180	3	11.4314	9.9618	24.658	0.661348		5.36558	3.48518	22.2891	2.62242	<== GCaMP6 is 2 fold
20	190	3.16667	10.8266	9.39736	23.6901	0.635387		7.90468	3.4477	48.0175	5.64947
21	200	3.33333	10.6307	9.42017	21.5259	0.577342		8.19065	3.4402	50.9447	5.99387
22	210	3.5	9.93174	8.6387	21.5691	0.578501		7.74759	3.31417	47.6483	5.60604
23	220	3.66667	10.2248	9.24098	19.0787	0.511706		8.06962	3.4352	49.7794	5.85676
24	230	3.83333	9.91085	9.08033	17.3855	0.466294		8.10461	3.45984	49.9076	5.87185
25	240	4	9.81275	8.87933	18.2135	0.488502		7.90289	3.38593	48.5555	5.71277
26	250	4.16667	9.76662	8.8754	17.7876	0.477078		8.17672	3.3081	51.9943	6.11736
