# Supplementary material for: Live imaging reveals the cellular events downstream of SARM1 activation
Source: eLife journal article supplement (doi:10.7554/elife.71148), 2021-11-15
Supplement: supp [file Source-Fig 4-figure supplement 1.xlsx]

## Sheet: Supple Fig. 2
Figure 4-figure supplement 1
	Time (hr)	Diff_TMRM (%)	Diff_GCaMP6 (%)
	0.166667	-0.278182	-3.29277
	0.333333	-10.6597	-0.920354
	0.5	5.35117	0.380351
	0.666667	7.52112	1.45225
	0.833333	-6.41254	-2.50533
	1	6.72688	-1.38367
	1.16667	-3.86156	2.0005
	1.33333	-2.28721	-0.240197
	1.5	9.82702	0.758231
	1.66667	-6.78797	-0.229204
	1.83333	-2.22276	4.91648
	2	1.61185	2.29453
	2.16667	-7.40089	-1.67779
	2.33333	-3.5767	-4.3064
	2.5	2.89202	-5.24506
	2.66667	-0.942314	7.14673
	2.83333	5.00759	-27.4525	<== Maximum decrease of TMRM
	3	184.937	-7.34461	<== Maximum increase of GCaMP6
	3.16667	115.43	-3.92546
	3.33333	6.09605	-9.13543
	3.5	-6.47046	0.200828
	3.66667	4.47243	-11.5462
	3.83333	0.257524	-8.87457
	4	-2.70917	4.76258
	4.16667	7.08214	-2.33854
