# Supplementary material for: Live imaging reveals the cellular events downstream of SARM1 activation
Source: eLife journal article supplement (doi:10.7554/elife.71148), 2021-11-15
Supplement: supp [file Source-Fig 5 B_C.xlsx]

## Sheet: Figure 5B_5C
Figure 5B				Figure 5C
	ATP drop (%)	MitoDsR rate drop			ATP drop (%)	MitoDsR stop time
	49.77	20.31			49.77	4.15
	56.63	4.55			56.63	4.23
	73.41	46.88			73.41	3.98
	49.65	24			49.65	4.15
	21.36	0			21.36	4.65
	41.58	4.35			41.58	4.48
	36.07	4.76			36.07	4.32
	39.81	0			39.81	4.4
	56.7	45			56.7	3.9
AVG	47.22	16.65			47.22	4.25111
SEM	4.93924	6.21212			4.93924	0.07959
