# Supplementary material for: Live imaging reveals the cellular events downstream of SARM1 activation
Source: eLife journal article supplement (doi:10.7554/elife.71148), 2021-11-15
Supplement: supp [file Source-Fig 5-figure supplement 1.xlsx]

## Sheet: Sheet1
	PercevalHR						PercevalHR
	DMSO						CCCP
	Avg ROI	Background	Axon (I)	Nor. Axon (I)			Avg ROI	Background	Axon (I)	Nor. Axon (I)
P1_0	2.95777	1.05432	20.0887	0.999061			3.068	1.04324	21.2908	0.999061
P1_2	2.99284	0.928163	21.575	0.949512			1.88921	1.08027	8.16965	0.430281
P2_0	3.45097	1.55575	20.5079	0.942654			3.14818	1.12366	21.3688	1.00272
P2_2	3.19435	1.12795	21.7919	0.962322			2.20464	1.29643	10.3785	0.387008
P3_0	3.15855	1.11258	21.5723	1.01227			3.27344	1.15904	22.3031	1.04656
P3_2	3.10308	1.10186	21.1141	0.929061			2.16536	1.27	9.2236	0.179737
P4_0	3.0884	0.940315	22.4212	0.992782			3.13064	1.01394	22.1809	1.04083
P4_2	3.05512	0.914582	22.3199	0.95326			2.02324	0.961459	10.5793	0.243351
	DMSO		CCCP
	Base	2hr	Base	2hr			DMSO	CCCP
P1	0.999061	0.949512	0.999061	0.430281		P1	-4.95954	-56.9314
P2	0.942654	0.962322	1.00272	0.387008		P2	2.08639	-61.4042
P3	1.01227	0.929061	1.04656	0.179737		P3	-8.22004	-82.8259
P4	0.992782	0.95326	1.04083	0.243351		P4	-3.98098	-76.6195
							-3.76854	-69.4453
