# Supplementary material for: Live imaging reveals the cellular events downstream of SARM1 activation
Source: eLife journal article supplement (doi:10.7554/elife.71148), 2021-11-15
Supplement: supp [file Source-Fig 5-figure supplement 2.xlsx]

## Sheet: Sheet1
08 27 2019	09 20 2019	10 07 2019
ATP Results	ATP Results	ATP Results		ATP relative to time 0 of each genotype				ave	std											> summary(anova_two_way)
230.004	26.5289	14.7308		1_WT_0h	0.644646	0.943329	0.958502													Df Sum Sq Mean Sq F value Pr(>F)
565.179	24.6399	15.2882		1_WT_0h	1.58406	0.876157	0.994771													genotype 1 6.315 6.315 78.859 7.24e-14 ***
381.371	29.9098	15.0905		1_WT_0h	1.06889	1.06355	0.981907													time 3 1.637 0.546 6.816 0.000349 ***
250.608	31.4121	16.3647		1_WT_0h	0.702396	1.11697	1.06482	1	0.0676033											genotype:time 3 6.327 2.109 26.336 3.00e-12 ***
53.5863	32.6094	12.2957		2_WT_2h	0.15019	1.15954	0.800053													Residuals 88 7.047 0.080
77.2385	31.3131	13.1512		2_WT_2h	0.216482	1.11345	0.855723													---
92.3738	29.8861	11.9227		2_WT_2h	0.258902	1.0627	0.775789													Signif. codes: 0 ‘***’ 0.001 ‘**’ 0.01 ‘*’ 0.05 ‘.’ 0.1 ‘ ’ 1
97.7625	27.9155	12.4142		2_WT_2h	0.274005	0.992632	0.807765	0.705603	0.108804											>
20.5723	15.7566	7.06862		3_WT_4h	0.0576593	0.560282	0.459941													> TukeyHSD(anova_two_way, which = "genotype")
20.9412	10.926	4.90838		3_WT_4h	0.0586933	0.388511	0.319378													Tukey multiple comparisons of means
17.2059	11.7081	6.49501		3_WT_4h	0.0482242	0.416321	0.422617													95% family-wise confidence level
8.63763	14.556	9.33262		3_WT_4h	0.0242093	0.517589	0.607255	0.32339	0.062867
#DIV/0!	#DIV/0!	#DIV/0!		4_WT_6h	0.00822057	0.0689951	0.166197													Fit: aov(formula = ATP ~ genotype + time + genotype:time, data = data)
2.93302	1.94033	2.55421		4_WT_6h	0.00492807	0.0512667	0.0861052
1.75829	1.44176	1.32331		4_WT_6h	0.00544817	0.0688741	0.0659519													$genotype
1.94386	1.93692	1.01358		4_WT_6h	0.00292776	0.0734548	0.080249	0.0568849	0.0136661											diff lwr upr p adj
1.0446	2.06575	1.23331		5_SARM1KO_0h	1.23554	0.911967	0.998236													02_SARM1KO-01_WT 0.5129433 0.3981529 0.6277336 0
134.238	25.2235	11.7362		5_SARM1KO_0h	0.97548	0.931612	0.954527
105.984	25.7668	11.2224		5_SARM1KO_0h	1.19406	1.00471	0.930803													> TukeyHSD(anova_two_way, which = "genotype:time")
129.732	27.7885	10.9434		5_SARM1KO_0h	0.594919	1.15172	1.11643	1	0.0487505											Tukey multiple comparisons of means
64.6366	31.8545	13.1259		6_SARM1KO_2h	0.349824	0.956622	1.14157													95% family-wise confidence level
38.0075	26.4586	13.4214		6_SARM1KO_2h	0.579735	0.885912	0.902674
62.9868	24.5029	10.6127		6_SARM1KO_2h	0.438171	0.779848	0.893774													Fit: aov(formula = ATP ~ genotype + time + genotype:time, data = data)
47.6062	21.5693	10.5081		6_SARM1KO_2h	0.498177	0.899216	1.06838	0.782825	0.0738471
54.1258	24.8708	12.5609		7_SARM1KO_4h	0.720578	0.9116	1.03261													$`genotype:time`
#DIV/0!	#DIV/0!	#DIV/0!		7_SARM1KO_4h	1.34022	0.806741	1.20601													diff lwr upr p adj
78.2891	25.2133	12.1404		7_SARM1KO_4h	1.1071	0.845629	1.38842													02_SARM1KO:0h-01_WT:0h 2.499988e-10 -0.35871242 0.35871242 1.0000000
145.611	22.3131	14.179		7_SARM1KO_4h	0.927777	1.0277	1.111	1.03545	0.0597902											01_WT:2h-01_WT:0h -2.943975e-01 -0.65310990 0.06431494 0.1895005
120.284	23.3887	16.3236		8_SARM1KO_6h	0.749033	0.969609	1.27597													02_SARM1KO:2h-01_WT:0h -2.171748e-01 -0.57588725 0.14153759 0.5681739
100.801	28.4244	13.062		8_SARM1KO_6h	2.54186	1.02734	1.80941													01_WT:4h-01_WT:0h -6.766100e-01 -1.03532241 -0.31789757 0.0000022
81.3806	26.8178	15.0016		8_SARM1KO_6h	1.57689	1.02578	1.44128													02_SARM1KO:4h-01_WT:0h 3.544794e-02 -0.32326448 0.39416036 0.9999865
276.168	28.4145	21.2732		8_SARM1KO_6h	1.44843	0.709782	1.25713	1.31938	0.146394											01_WT:6h-01_WT:0h -9.431151e-01 -1.30182753 -0.58440268 0.0000000
171.326	28.3714	16.9451																		02_SARM1KO:6h-01_WT:0h 3.193774e-01 -0.03933503 0.67808981 0.1176301
157.369	19.6314	14.7801																		01_WT:2h-02_SARM1KO:0h -2.943975e-01 -0.65310990 0.06431494 0.1895005
																				02_SARM1KO:2h-02_SARM1KO:0h -2.171748e-01 -0.57588725 0.14153759 0.5681739
																				01_WT:4h-02_SARM1KO:0h -6.766100e-01 -1.03532241 -0.31789757 0.0000022
																				02_SARM1KO:4h-02_SARM1KO:0h 3.544794e-02 -0.32326449 0.39416036 0.9999865
																				01_WT:6h-02_SARM1KO:0h -9.431151e-01 -1.30182753 -0.58440268 0.0000000
																				02_SARM1KO:6h-02_SARM1KO:0h 3.193774e-01 -0.03933503 0.67808981 0.1176301
																				02_SARM1KO:2h-01_WT:2h 7.722265e-02 -0.28148977 0.43593507 0.9976040
																				01_WT:4h-01_WT:2h -3.822125e-01 -0.74092493 -0.02350009 0.0283780
																				02_SARM1KO:4h-01_WT:2h 3.298454e-01 -0.02886700 0.68855784 0.0948104
																				01_WT:6h-01_WT:2h -6.487176e-01 -1.00743005 -0.29000520 0.0000061
																				02_SARM1KO:6h-01_WT:2h 6.137749e-01 0.25506245 0.97248730 0.0000217
																				01_WT:4h-02_SARM1KO:2h -4.594352e-01 -0.81814758 -0.10072274 0.0034439
																				02_SARM1KO:4h-02_SARM1KO:2h 2.526228e-01 -0.10608965 0.61133519 0.3697903
																				01_WT:6h-02_SARM1KO:2h -7.259403e-01 -1.08465270 -0.36722785 0.0000003
																				02_SARM1KO:6h-02_SARM1KO:2h 5.365522e-01 0.17783980 0.89526464 0.0003078
																				02_SARM1KO:4h-01_WT:4h 7.120579e-01 0.35334551 1.07077035 0.0000006
																				01_WT:6h-01_WT:4h -2.665051e-01 -0.62521754 0.09220731 0.3017420
																				02_SARM1KO:6h-01_WT:4h 9.959874e-01 0.63727496 1.35469980 0.0000000
																				01_WT:6h-02_SARM1KO:4h -9.785630e-01 -1.33727547 -0.61985062 0.0000000
																				02_SARM1KO:6h-02_SARM1KO:4h 2.839295e-01 -0.07478297 0.64264188 0.2275996
																				02_SARM1KO:6h-01_WT:6h 1.262492e+00 0.90378007 1.62120492 0.0000000
