# Supplementary material for: Live imaging reveals the cellular events downstream of SARM1 activation
Source: eLife journal article supplement (doi:10.7554/elife.71148), 2021-11-15
Supplement: supp [file Source-Fig 6 A_B_E.xlsx]

## Sheet: Figure 6A_6B
Figure 6A								Figure 6B
	Time (hr)	Ca	AnnexinV	mRuby3				Ca	AnnexinV	Delta. Time
	0	1	1	1				3.96222	4.29556	0.33334
	0.275	1.18229	1.09619	1.0041				3.55754	3.9606	0.40306
	0.775	0.865986	0.960921	1.02052				4.59056	4.92389	0.33333
	1.275	0.929364	0.963588	0.926845				3.09055	3.75722	0.66667
	1.775	1.13872	1.09558	0.889938				4.07048	4.67055	0.60007
	2.275	1.04073	1.09342	0.967855				3.17784	3.84441	0.66657
	2.775	1.0042	1.18166	0.914535				4.51914	5.01914	0.5
	3.275	1.00795	1.19583	0.926845				5.10775	5.67025	0.5625
	3.775	1.02503	1.22568	0.926845				3.52823	4.02823	0.5
	4.275	1.18012	1.17892	0.984246				5.03238	5.53239	0.50001
	4.775	4.21524	1.14071	0.98835			AVG	4.06367	4.57022	0.506555
	5.275	4.7075	1.88778	0.930948			SEM	0.230902	0.221136	0.0385813
	5.775	4.54455	5.7555	1.02115
	6.275	4.4765	6.32494	0.575462

## Sheet: Figure 6E
Figure 6E
		Wild-type			SARM1KO
		No cut	Cut_4 hr	Cut_4 hr_EGTA	No cut	Cut_4 hr	Cut_24 hr	Cut_48 hr
		0.919252	14.3054	1.23791	0.502175	1.88495	1.11204	1.52471
		1.98125	16.1515	1.53045	0.713819	2.08459	1.79691	1.72112
		0.436425	14.1331	2.74168	1.5089	1.88119	1.48648	1.59642
		0.188735	23.6365	0.754738	4.5992	5.82308	1.08913	0.95689
		0.30011	24.9645	0.251293	4.28688	1.02352	2.20239	1.84252
		0.304547	13.621	1.17789	2.67613	0.517907	0.803942	1.83411
	AVG	0.688387	17.802	1.28233	2.38118	2.20254	1.41515	1.5793
	SEM	0.279048	2.09152	0.343779	0.723647	0.76495	0.211528	0.134783
