# Supplementary figures and images for: Live imaging reveals the cellular events downstream of SARM1 activation
Source: eLife journal article supplement (doi:10.7554/elife.71148), 2021-11-15

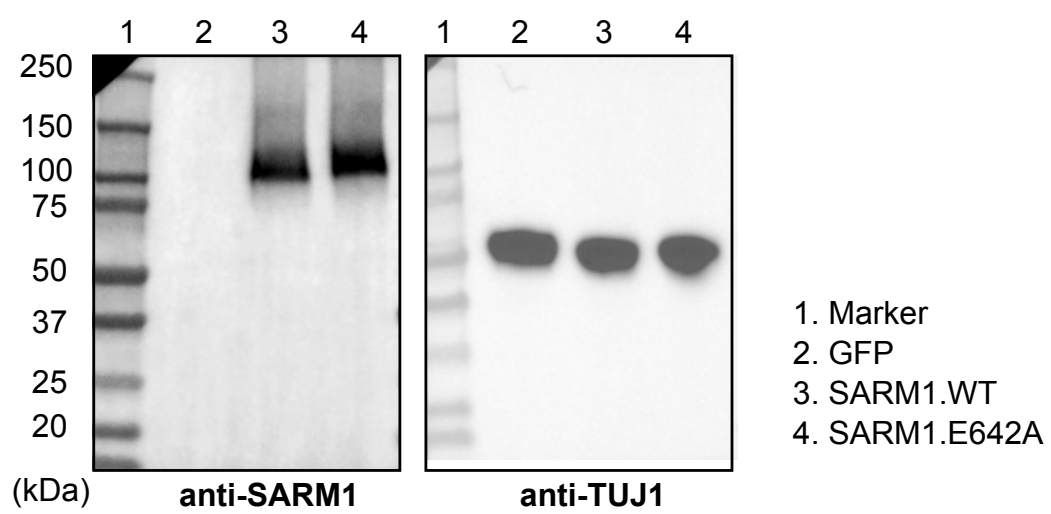

Supplement: supp [file elife_poa_e71148_Figure_1_figure_supplement_1.pdf › elife_poa_e71148_Figure_1_figure_supplement_1.pdf]

**A**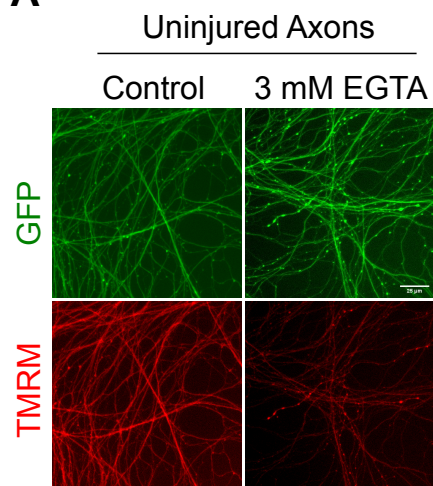**B**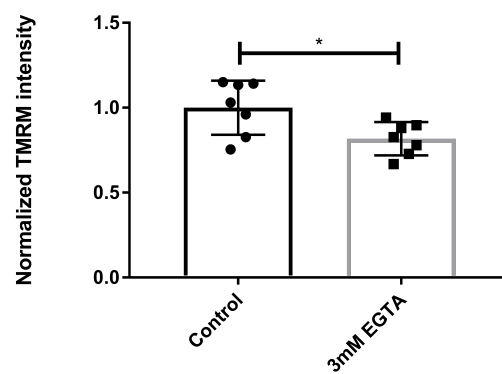**C**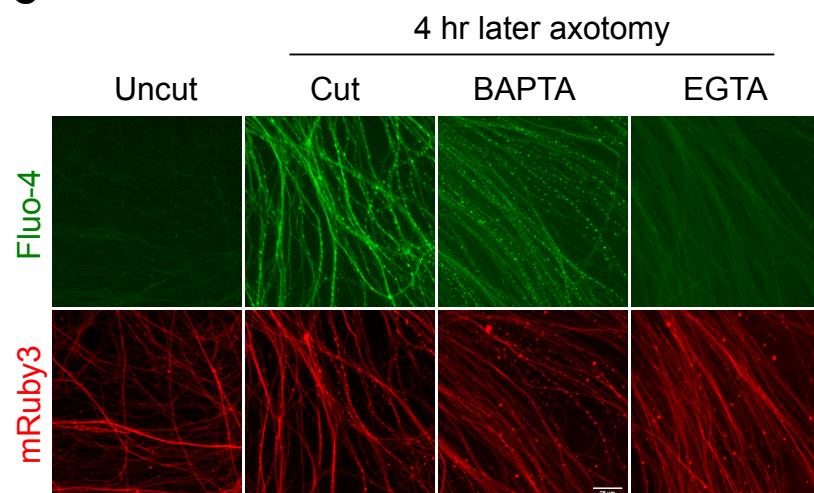**D**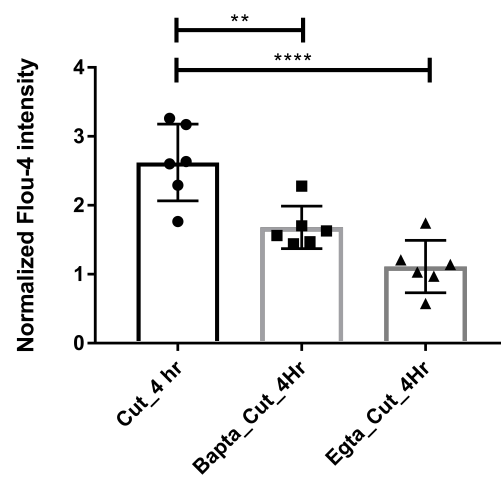

Supplement: supp [file elife_poa_e71148_Figure_2_figure_supplement_1.pdf › elife_poa_e71148_Figure_2_figure_supplement_1.pdf]

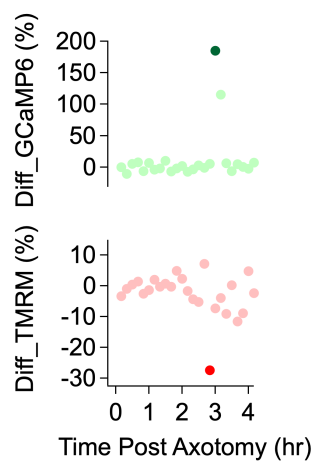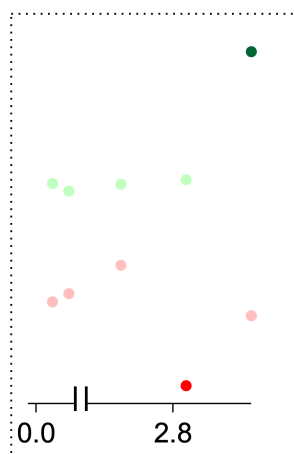

Supplement: supp [file elife_poa_e71148_Figure_4_figure_supplement_1.pdf › elife_poa_e71148_Figure_4_figure_supplement_1.pdf]

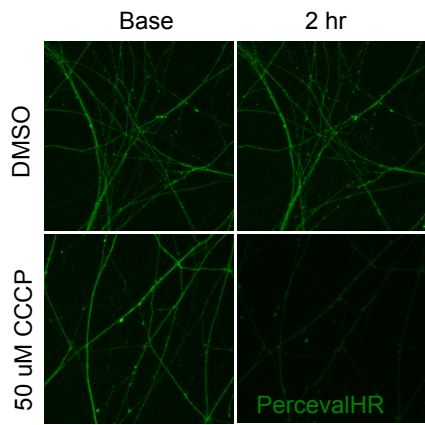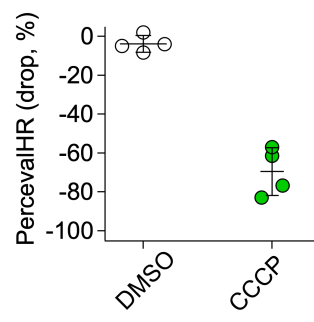

Supplement: supp [file elife_poa_e71148_Figure_5_figure_supplement_1.pdf › elife_poa_e71148_Figure_5_figure_supplement_1.pdf]

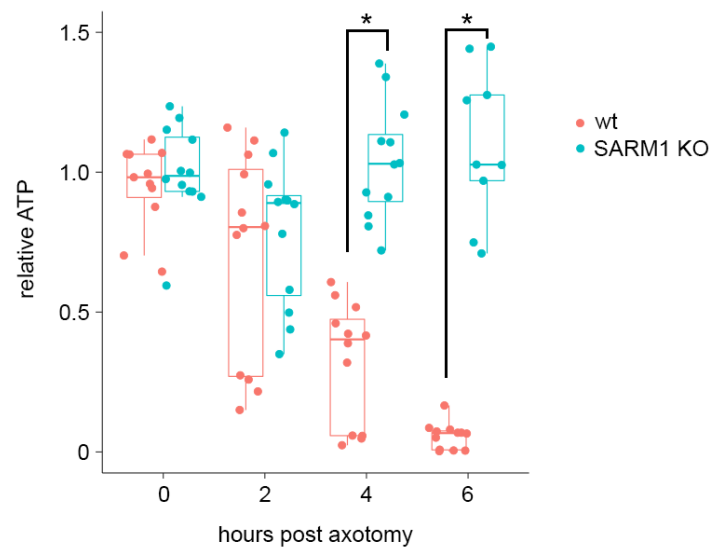

Supplement: supp [file elife_poa_e71148_Figure_5_figure_supplement_2.pdf › elife_poa_e71148_Figure_5_figure_supplement_2.pdf]

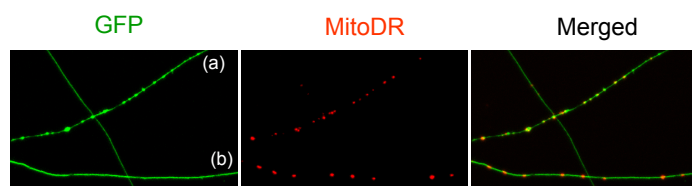

**(a) Injured**

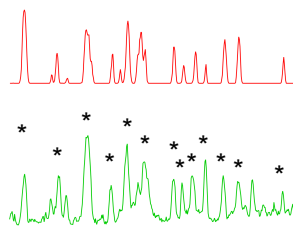

**(b) Uninjured**

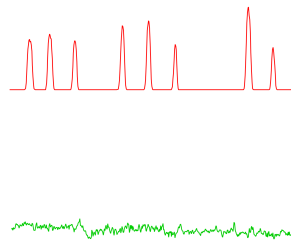

Supplement: supp [file elife_poa_e71148_Figure_7_figure_supplement_1.pdf › elife_poa_e71148_Figure_7_figure_supplement_1.pdf]
